# Supplementary material for: Impact of Limited Solvent Capacity on Metabolic Rate, Enzyme Activities, and Metabolite Concentrations of S. cerevisiae Glycolysis
Source: PLOS journal article supplement (doi:10.1371/journal.pcbi.1000195), 2008-10-09
Supplement: S1 (10.1371/journal.pcbi.1000195.s001) [file journal.pcbi.1000195.s001]

301 Moved Permanently

# Moved Permanently

The document has moved here.

---

Apache Server at www.ploscompbiol.org Port 80
